# Supplementary material for: The development of a multiplex real-time PCR to quantify Fusarium DNA of trichothecene and fumonisin producing strains in maize
Source: Royal Society of Chemistry journal article supplement (doi:10.1039/c4ay02581d), 2014-12-19
Supplement: c4ay02581d1.pdf [file c4ay02581d1.pdf]

## Supporting Information

**Table S1:** Twenty-four maize samples were analyzed with qPCR as well as with LC-MS/MS to get information about the correlation of *Fusarium* DNA with mycotoxin content. This list provides all experimental data results.

| Sample identification number | PCR determined infection (singleplex) |                 | PCR determined infection (multiplex) |                 | Trichothecenes [µg/kg] |      |       |        |       |       |       |       | Fumonisin [µg/kg] |                |                |
|------------------------------|---------------------------------------|-----------------|--------------------------------------|-----------------|------------------------|------|-------|--------|-------|-------|-------|-------|-------------------|----------------|----------------|
|                              | <i>tri5</i> [%]                       | <i>fum1</i> [‰] | <i>tri5</i> [%]                      | <i>fum1</i> [‰] | DON                    | D3G  | NIV   | 3-ADON | T-2   | HT-2  | DAS   | NEO   | B <sub>1</sub>    | B <sub>2</sub> | B <sub>3</sub> |
| 1001                         | 2,83                                  | 0,00575         | 2,29                                 | 0,00559         | 3880                   | 1733 | 7.92  | 70.3   | 2.69  | 16.3  | < LOD | < LOD | < LOD             | < LOD          | < LOD          |
| 1005                         | 1,63                                  | 0,00543         | 0,84                                 | 0,00834         | 3448                   | 1083 | 16.5  | 80.8   | 6.64  | 11.3  | < LOD | < LOD | 115               | < LOD          | 23.6           |
| 1006                         | 1,78                                  | 0,03072         | 1,60                                 | 0,0428          | 2040                   | 1015 | 132.8 | 74.9   | 2.95  | 13.3  | 0.51  | < LOD | 233               | 48.5           | 79.7           |
| 1007                         | 1,89                                  | 0,01613         | 1,72                                 | 0,01634         | 2192                   | 839  | 14.6  | 29     | < LOD | 3.55  | 0.76  | < LOD | < LOD             | < LOD          | < LOD          |
| 1008                         | 1,10                                  | 0,23280         | 0,82                                 | 0,21852         | 2680                   | 1367 | 24.9  | 98.4   | 43.1  | 54.7  | 0.96  | < LOD | 558               | 174            | 29.6           |
| 1009                         | 1,67                                  | 0,02620         | 0,90                                 | 0,04848         | 2960                   | 1428 | 116   | 49.2   | < LOD | 3.77  | 1.36  | < LOD | 74.4              | 25.5           | < LOD          |
| 1010                         | 1,07                                  | 0,07766         | 1,04                                 | 0,0702          | 3240                   | 1706 | 125   | 62.9   | < LOD | < LOD | < LOD | < LOD | 117               | 20.2           | 17.1           |
| 1011                         | 2,95                                  | 0,04082         | 2,70                                 | 0,0382          | 3264                   | 1794 | 204   | 97.6   | < LOD | < LOD | < LOD | < LOD | 161               | 23.5           | 21.1           |
| 1012                         | 1,20                                  | 0,06864         | 0,71                                 | 0,05985         | 2776                   | 1008 | 22.2  | 63.4   | 55.8  | 156   | 0.58  | 6.05  | 1115              | 243            | 106            |
| 1013                         | 0,94                                  | 0,02776         | 0,51                                 | 0,01466         | 4064                   | 853  | 218   | 139    | < LOD | 4.38  | < LOD | < LOD | 64.6              | 23.9           | < LOD          |
| 1015                         | 1,77                                  | 0,06958         | 1,16                                 | 0,06059         | 7864                   | 1482 | 416   | 311    | 2.46  | 5.53  | < LOD | < LOD | 428               | 88.8           | 37.9           |
| 1016                         | 1,30                                  | 0,10853         | 1,58                                 | 0,0994          | 5392                   | 988  | 637   | 110    | 63.7  | 294   | 0.67  | 13.11 | 2488              | 691            | 341            |
| 1018                         | 1,73                                  | 0,03080         | 1,89                                 | 0,0515          | 9280                   | 2856 | 518   | 289    | < LOD | 7.45  | < LOD | < LOD | < LOD             | < LOD          | < LOD          |
| 1020                         | 3,12                                  | 0,06969         | 2,82                                 | 0,0744          | 13680                  | 2856 | 821   | 337    | 3.16  | 17.6  | < LOD | 2.52  | 476               | 107            | 68.6           |
| 1021                         | 1,11                                  | 0,03625         | 0,98                                 | 0,05262         | 3232                   | 907  | 220   | 294    | 9.21  | 25    | 0.5   | < LOD | 97.7              | 38.2           | 22.1           |
| 1022                         | 0,34                                  | 0,04620         | 0,21                                 | 0,03994         | 6496                   | 1022 | 29.3  | 338    | < LOD             | < LOD          | < LOD          |
| 1023                         | 0,28                                  | 0,02658         | 0,10                                 | 0,01515         | 464.8                  | 72   | 14.7  | 28     | < LOD | < LOD | < LOD | < LOD | 263               | 135            | 21.9           |
| 1025                         | 1,98                                  | 0,11999         | 1,56                                 | 0,12291         | 5328                   | 1963 | 102   | 327    | 2.01  | < LOD | 0.76  | < LOD | 241               | 74.1           | 24.6           |
| 1026                         | 0,95                                  | 0,00705         | 0,59                                 | 0,00611         | 3912                   | 1008 | 27.2  | 249    | 3.04  | < LOD | < LOD | < LOD | < LOD             | < LOD          | < LOD          |
| 1028                         | 2,81                                  | 0,02357         | 2,57                                 | 0,02919         | 6432                   | 1157 | 126   | 434    | < LOD | < LOD | < LOD | < LOD | 81.4              | 21.6           | < LOD          |
| 1030                         | 0,58                                  | 0,00391         | 0,29                                 | 0,00550         | 1616                   | 277  | 234   | 93.6   | < LOD             | < LOD          | < LOD          |
| 1034                         | 0,34                                  | 0,00615         | 0,21                                 | 0,02            | 816                    | 181  | 14.3  | 43.9   | 4.75  | 5.73  | < LOD | < LOD | < LOD             | < LOD          | < LOD          |
| 1037                         | 1,24                                  | 0,03570         | 1,60                                 | 0,023           | 3800                   | 948  | 220.9 | 271    | 6.83  | 3.68  | < LOD | < LOD | 45.1              | 27.4           | 11.3           |
| 1038                         | 3,28                                  | 0,00286         | 3,33                                 | 0,00082         | 8960                   | 2734 | 208.6 | 960    | 9.12  | 30.5  | < LOD | < LOD | < LOD             | < LOD          | < LOD          |
